# Supplementary material
Source: PubMed Central journal article supplement (PMC6542668)
Supplement: EMS82808-supplement-Figure_S1.pdf [file EMS82808-supplement-Figure_S1.pdf]

**Fig. S1.**

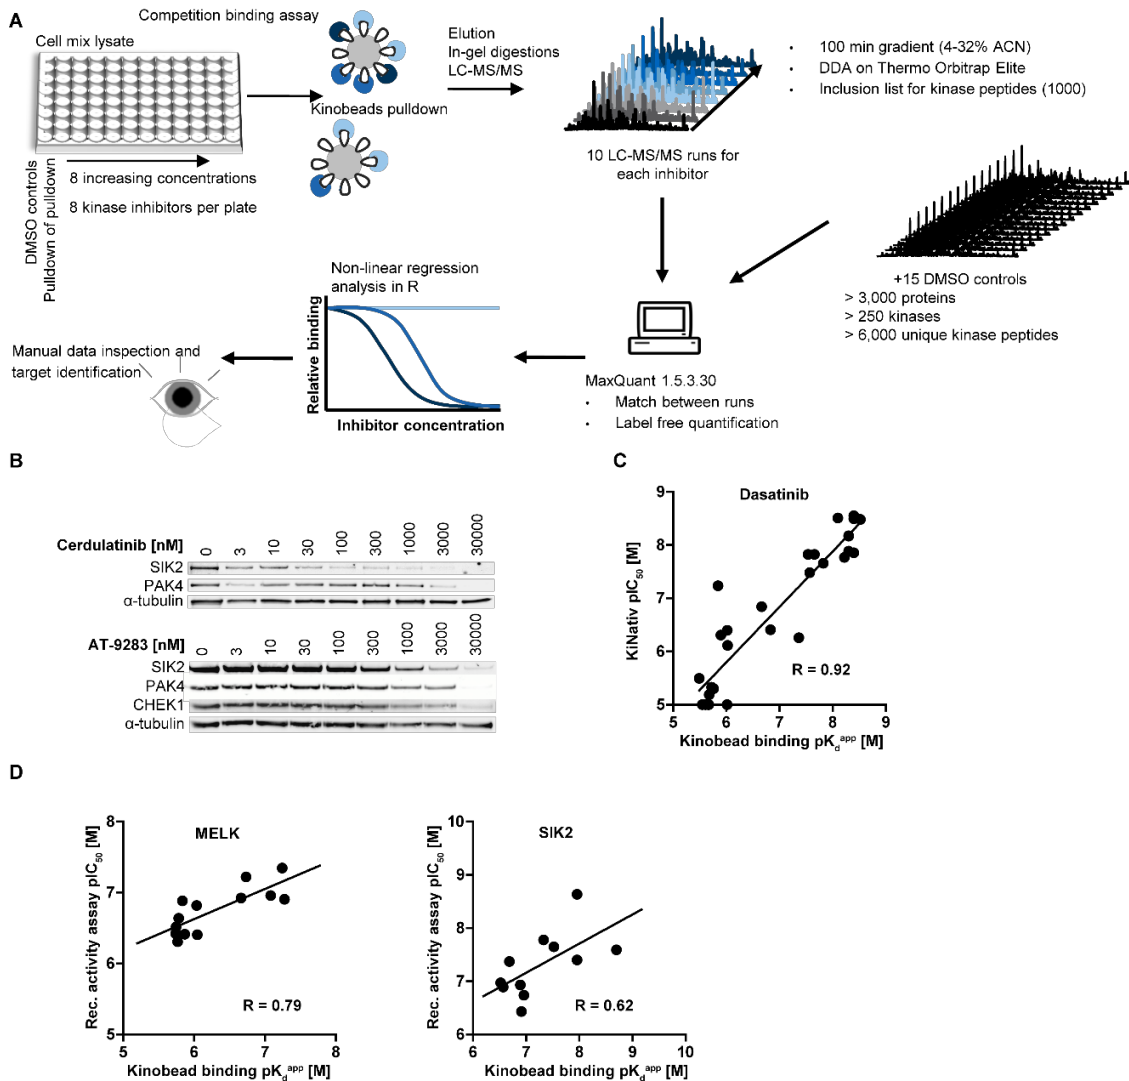

**Fig. S1 | Kinobeads Drug Screen workflow and evaluation.** (A) Kinobead pull-downs were performed in 96-well format. Eight doses were used for each drug plus vehicle control and a second pull-down of the vehicle control (pull-down of pull-down). This control was used to correct for protein depletion from the lysate caused by the affinity enrichment (see methods). Proteins were eluted from beads, run ~1 cm into a LDS gel and in-gel digested with trypsin. Each pull-down was analysed by liquid chromatography tandem mass spectrometry and using an inclusion list of kinase peptide  $m/z$  and retention times collected in prior experiments. MS data from the same 15 vehicle control Kinobeads pull-downs were added to the MaxQuant/Andromeda software for consistent protein identification and quantification. Dose response plots were generated and target proteins manually annotated. (B) Kinobead western Blot readout for selected inhibitor:protein combinations. (C) Dasatinib target  $pK_d^{app}$  correlate well with KiNativ binding data for the same inhibitor. (D) Correlation of Kinobeads binding data for clinical MELK and SIK2 inhibitors to  $IC_{50}$ -values obtained in recombinant activity assays shows reasonable agreement between the two assay formats.

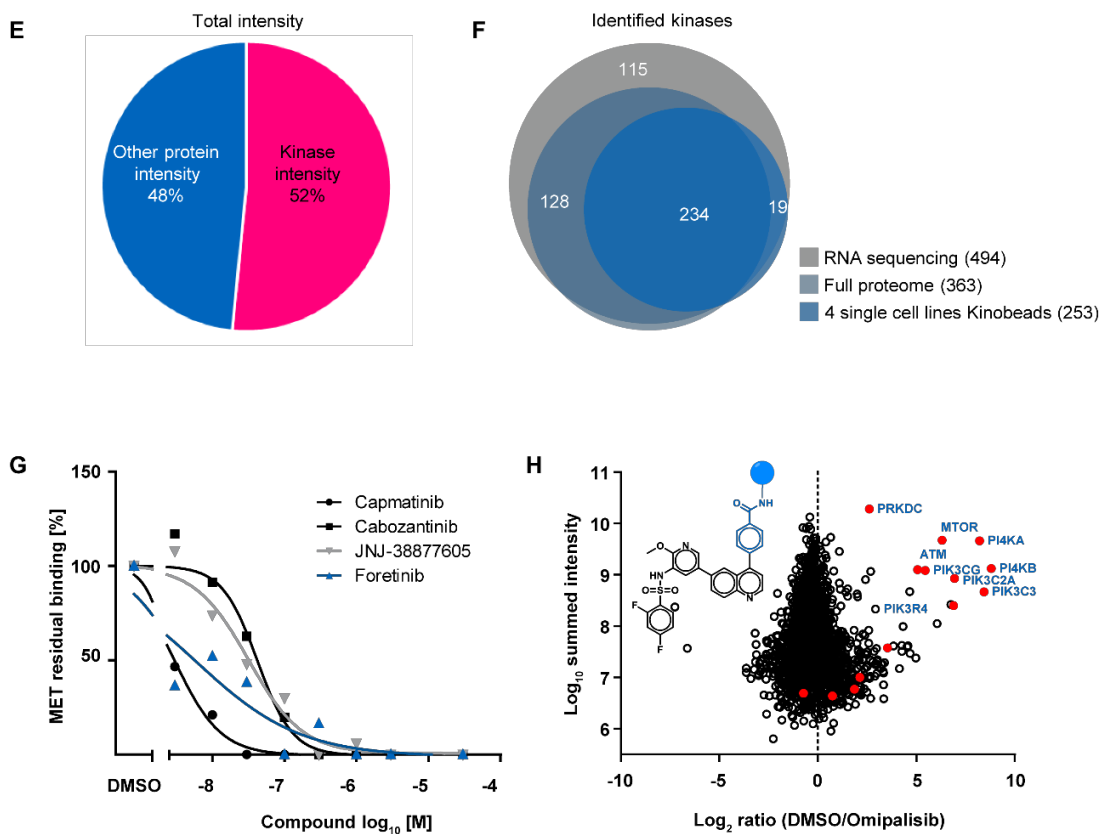

**Fig. S1 continued | Kinobeads Drug Screen workflow and evaluation. (E)** Intensity distribution of proteins captured on Kinobeads. From the total MS peptide intensities, 52% originated from kinase peptides illustrating good enrichment of kinases on Kinobeads. **(F)** Venn diagram of the overlap of protein kinases identified in the RNA-seq data, full proteome analysis and Kinobeads pulldowns in K-562, M-4-11, COLO 205 and SK-N-BE(2) cells. **(G)** Examples for Kinobeads experiments performed to profile MET inhibitors using a lysate mixture of the four standard cell lines supplemented with Caki-1 cell lysate (high MET expression). **(H)** Kinobeads competition data for MTOR/PI3K-family members (red) using immobilized Omipalisib (inset) and unmodified Omipalisib as the competitor.
