# Supplementary material
Source: PubMed Central journal article supplement (PMC6542668)
Supplement: EMS82808-supplement-Figure_S4.pdf [file EMS82808-supplement-Figure_S4.pdf]

**Fig. S4.**

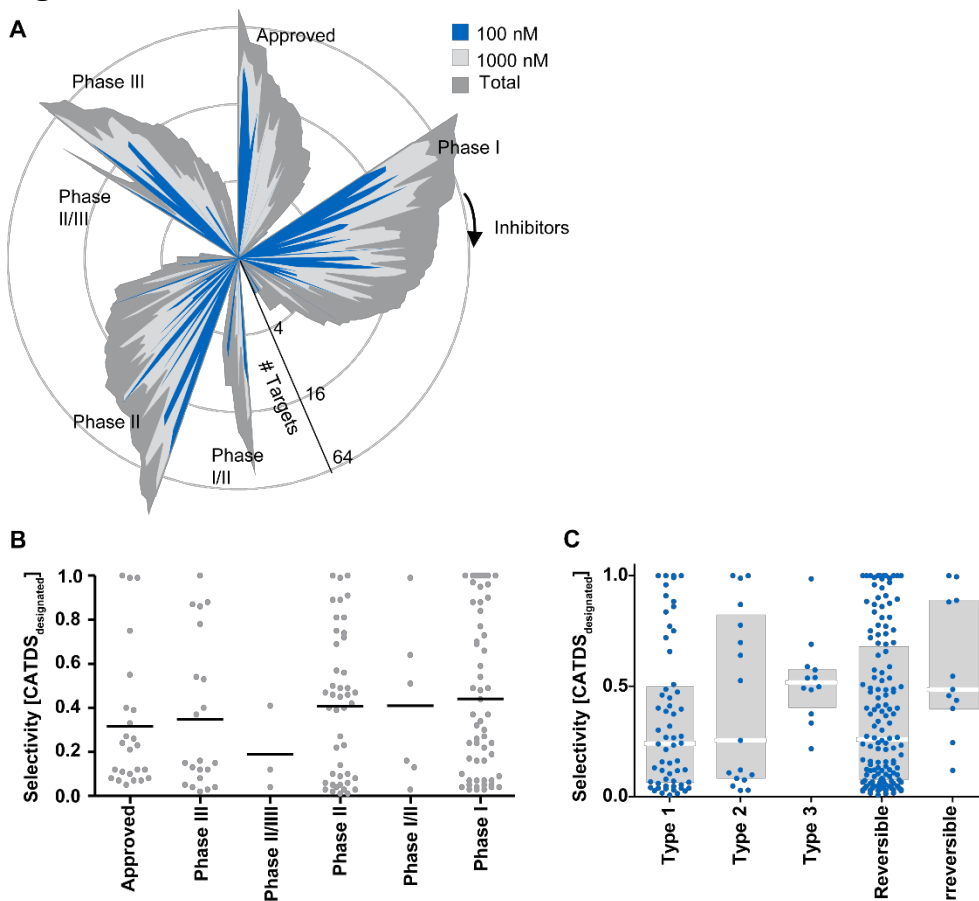

**Fig. S4 | Evaluation of drug selectivity – global dataset.** (A) Inhibitors grouped by status of clinical evaluation. Given is the number of targets with a potency of below 100 nM (blue), 1,000 nM (light grey) and any concentration (total; dark grey). (B) CATDS analysis of drug selectivity according to clinical status (determined from the CATDS for all designated targets at the concentration of the most potent designated target; CATDS<sub>designated</sub>). There was no difference in selectivity between clinical phases confirming that selectivity is not a strict requirement for progressing a compound in the clinic. (C) Selectivity analysis of 137 kinase inhibitors with annotated binding type according to CATDS<sub>designated</sub> (the most potent designated target of a compound at its  $K_d^{app}$ ). Type 1 and 2 inhibitors did not differ in median selectivity; while type 3 inhibitors were generally more selective. Irreversible and reversible inhibitors spanned a broad range of selectivity, albeit highly selective molecules were apparent in both.

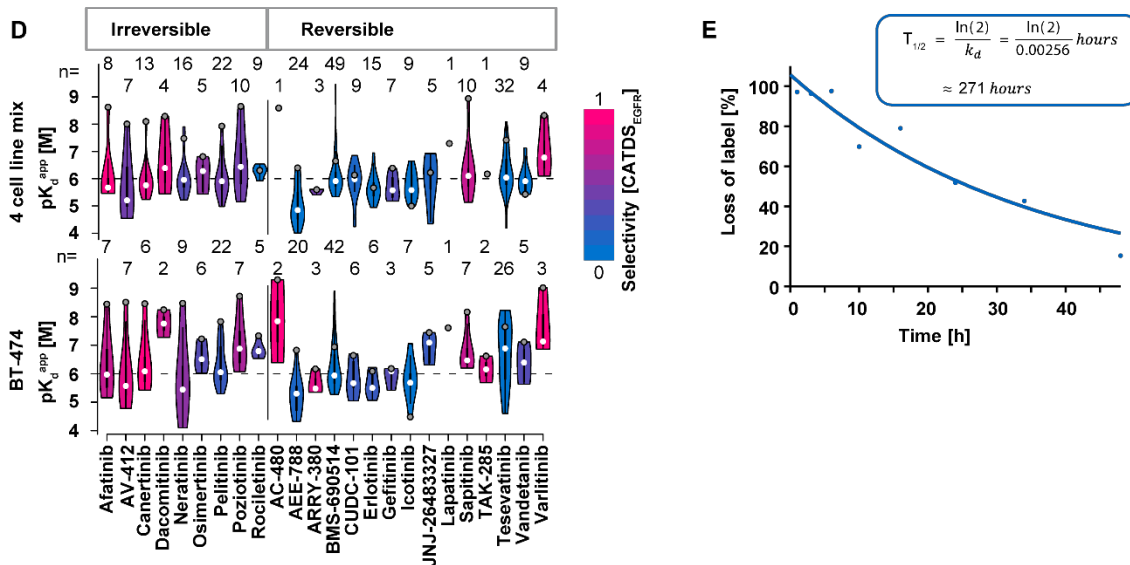

**Fig. S4 continued | Evaluation of drug selectivity – irreversible and reversible EGFR inhibitors.**

**(D)** Violin plots of EGFR inhibitors profiled in the lysate mixture of the four cell lines (top panel) as well as BT-474 cells (bottom panel). Given are  $pK_d^{app}$  values of all high-confidence, direct-binder targets ( $pK_d^{app}$  of EGFR highlighted as a grey circle). The shape of the violin indicates the number of targets at the respective  $pK_d^{app}$ . The total number of targets is printed at the top (e.g.  $n=8$ ). Violin colors are according to selectivity for EGFR ( $CATDS_{EGFR}$ ). **(E)** EGFR turnover measured by pulsed SILAC mass spectrometry and monitoring the loss of a heavy label over time. EGFR turnover was corrected for cell doubling to obtain protein half-lives.

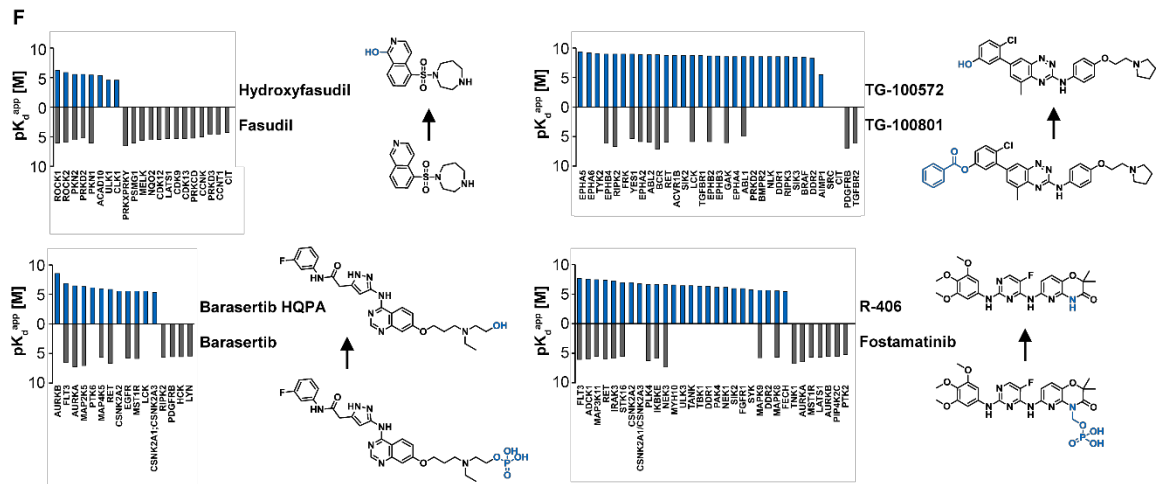

**Fig. S4 continued** Evaluation of drug selectivity. **(F)** Kinobeads target profiling data of a pro-drug (grey) compared to the active drug (blue) for different compounds that are formulated as pro-drugs.
