# Supplementary material
Source: PubMed Central journal article supplement (PMC6542668)
Supplement: EMS82808-supplement-Figure_S7.pdf [file EMS82808-supplement-Figure_S7.pdf]

**Fig. S7.**

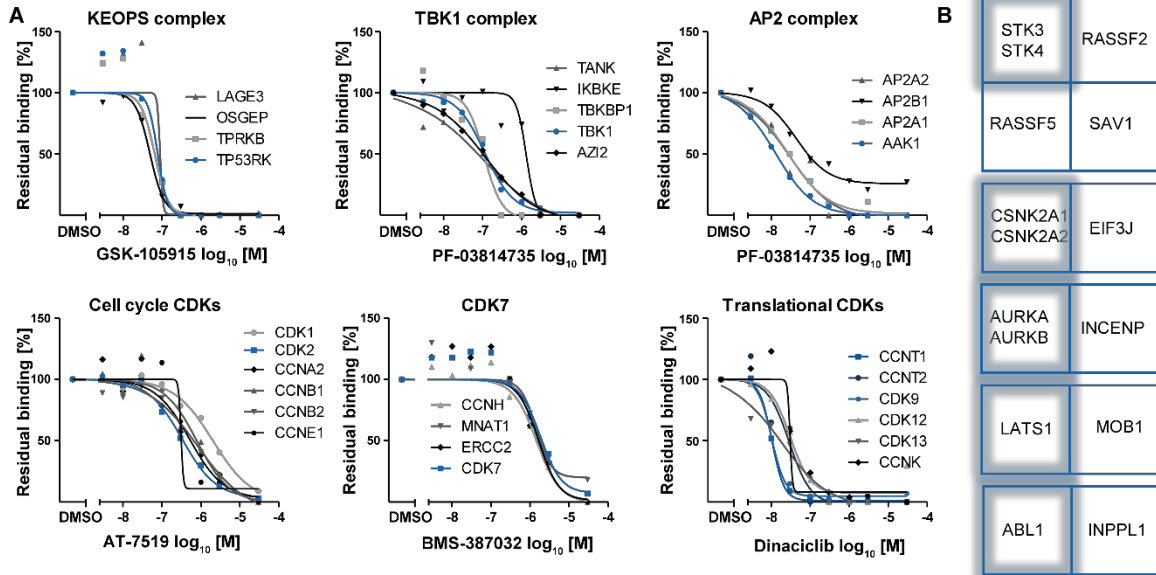

**Fig. S7 | Kinobeams binding of protein complexes (A)** Co-competed proteins forming KEOPS, TBK1, AP2 and CDK/Cyclin complexes are shown as examples. **(B)** Schematic representation of additional protein complexes identified in the Kinobeams pulldowns that showed similar curve characteristics (blue, direct Kinobead binder).

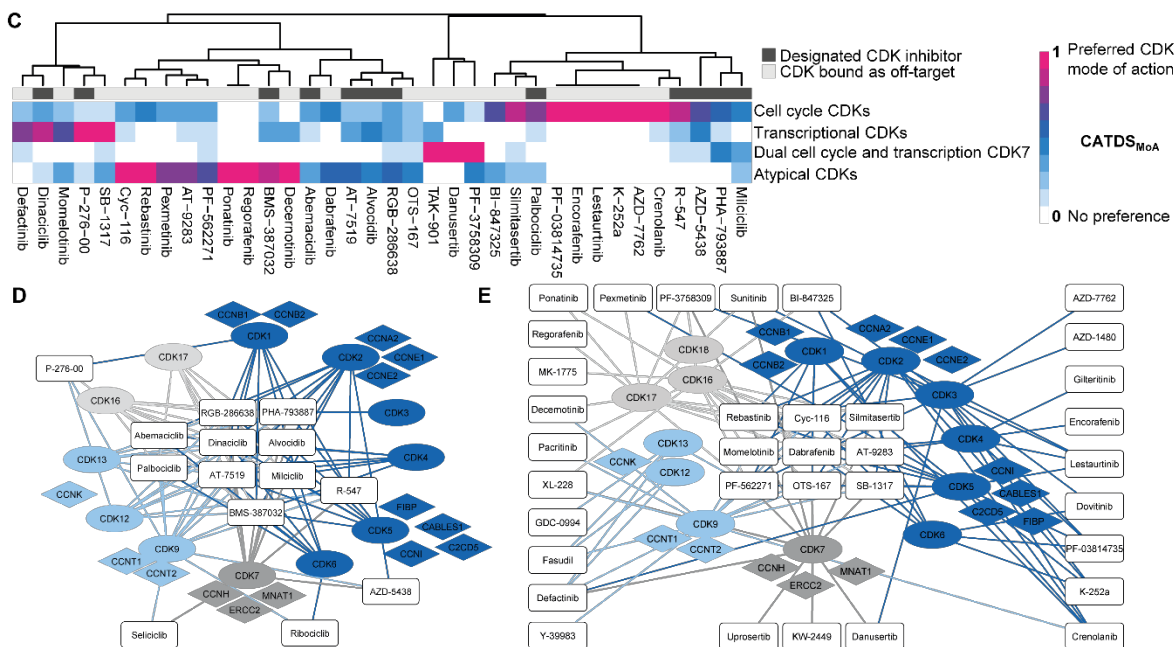

**Fig. S7 continued | Kinobeads binding of protein complexes – CDKs. (C)** Clustering of inhibitors targeting CDKs according to CATDS<sub>MoA</sub> (see Supplementary Text for details). Compounds either had no preference (white-light blue) or targeted the same biological process (pink; e.g., the cell cycle). Off-target CDK inhibitors (light grey bar) often inhibited one potential CDK mode-of-action. **(D)** Designated CDK inhibitors targeted all CDK/cyclins irrespective of the biological process a particular complex is involved in (cell cycle in dark blue, translation in light blue, dual cell cycle and transcription CDK7 in dark grey, atypical CDKs in light grey). **(E)** Conversely, off-target CDK inhibitors showed some preference for the cell cycle (dark blue), translation (light blue), dual cell cycle and transcription CDK7 (dark grey) or atypical CDKs (light grey).
