# Supplementary material
Source: PubMed Central journal article supplement (PMC6542668)
Supplement: EMS82808-supplement-Figure_S8.pdf [file EMS82808-supplement-Figure_S8.pdf]

**Fig. S8.**

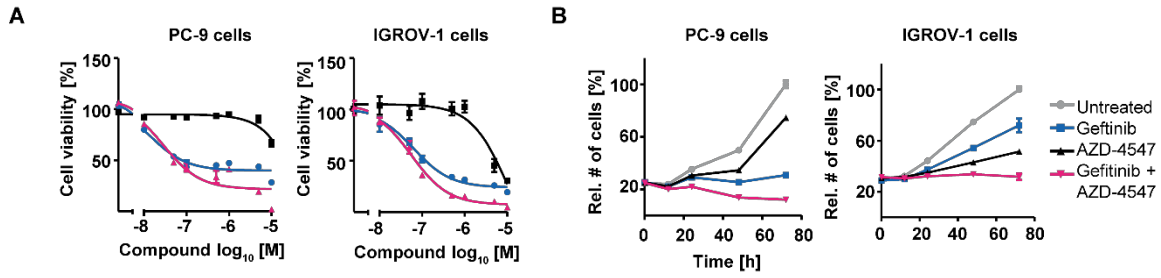

**Fig. S8 | From target to pathway engagement – combination treatment.** (A) Viability assays of drug combination treatment in lung (PC-9) and ovarian (IGROV-1) cancer cell lines. (B) Proliferation assays (from left to right) for PC-9 and IGROV-1 with single and drug combination treatment with Gefitinib and AZD-4547. Combination treatment of Gefitinib and AZD-4547 was more effective than any single drug. Experiments were performed in technical triplicates and error bars depict standard deviation.

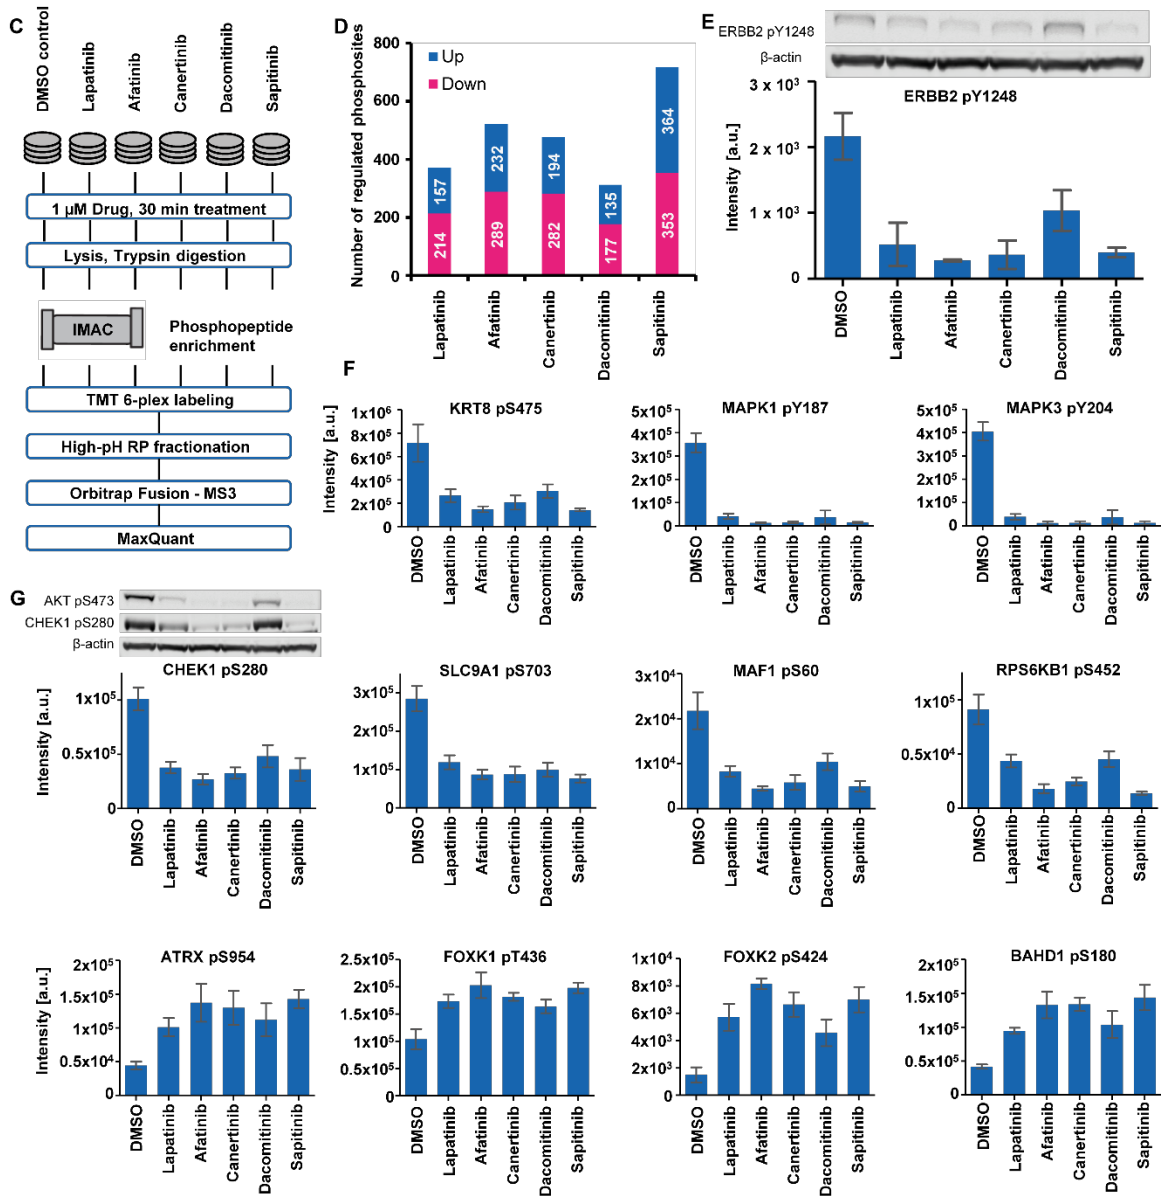

**Fig. S8 continued | From target to pathway engagement – EGFR pathway.** (C) Workflow for quantitative phosphoproteomics in BT-474 cell lines treated with different EGFR/ERBB2 inhibitors (in four replicates). (D) Number of reproducible (at least 3 from 4 biological replicates) significantly up- (blue) and down-regulated (pink) phosphorylated sites observed for each drug (two-sided t-test,  $p < 0.01$ ). (E) Down-regulation of the ERBB2 autophosphorylation site pY1248 can be used as a target engagement marker in cells for all drugs shown. (F-G) Up- and down-regulated phosphorylated sites for (F) known and (G) novel members of the ERBB2 network. Error bars depict the standard deviation.
