# Supplementary material
Source: PubMed Central journal article supplement (PMC6542668)
Supplement: EMS82808-supplement-Table_S12.pdf [file EMS82808-supplement-Table_S12.pdf]

**Table S12.**

Summary of kinase assay data performed at Reaction Biology Corporation. IC<sub>50</sub> values for kinases where obtained from dose responses in single measurements. Kinases not tested (n.d.) or not inhibited (n.i) are indicated as such.

| <i>Kinases</i>                  | <i>Dabrafenib IC<sub>50</sub> [M]</i> | <i>Ponatinib IC<sub>50</sub> [M]</i> |
|---------------------------------|---------------------------------------|--------------------------------------|
| <i>ABL1</i>                     | 5.19E-06                              | < 1.00E-9                            |
| <i>ABL2/ARG</i>                 | 2.94E-06                              | n.d.                                 |
| <i>ALK5/TGFBR1</i>              | 9.87E-07                              | n.d.                                 |
| <i>ARAF</i>                     | 1.39E-10                              | n.d.                                 |
| <i>BRAF</i>                     | 6.30E-10                              | n.d.                                 |
| <i>BRAF (V599E)</i>             | 4.05E-09                              | n.d.                                 |
| <i>BRK</i>                      | 1.13E-08                              | n.d.                                 |
| <i>CDK16/cyclin Y (PCTAIRE)</i> | 2.90E-08                              | n.d.                                 |
| <i>CDK1/cyclin A</i>            | 5.69E-06                              | n.d.                                 |
| <i>CDK1/cyclin B</i>            | 2.22E-06                              | n.d.                                 |
| <i>CDK1/cyclin E</i>            | 2.92E-07                              | n.d.                                 |
| <i>CDK2/cyclin A</i>            | 7.47E-06                              | n.d.                                 |
| <i>CDK2/cyclin A1</i>           | n.i.                                  | n.d.                                 |
| <i>CDK2/cyclin E</i>            | n.i.                                  | n.d.                                 |
| <i>CDK2/cyclin O</i>            | 9.40E-06                              | n.d.                                 |
| <i>CDK3/cyclin E</i>            | 6.86E-06                              | n.d.                                 |
| <i>CDK4/cyclin D1</i>           | 8.52E-07                              | n.d.                                 |
| <i>CDK4/cyclin D3</i>           | 1.84E-06                              | n.d.                                 |
| <i>CDK5/p25</i>                 | 4.92E-06                              | n.d.                                 |
| <i>CDK5/p35</i>                 | 3.71E-06                              | n.d.                                 |
| <i>CDK6/cyclin D1</i>           | n.i.                                  | n.d.                                 |
| <i>CDK6/cyclin D3</i>           | 5.37E-07                              | n.d.                                 |
| <i>CK1a1</i>                    | n.i.                                  | n.d.                                 |
| <i>CSK</i>                      | 4.24E-08                              | n.d.                                 |
| <i>EIF2AK1</i>                  | 4.82E-08                              | n.d.                                 |
| <i>FGR</i>                      | 5.35E-07                              | n.d.                                 |
| <i>FRK/PTK5</i>                 | 3.97E-07                              | n.d.                                 |
| <i>FYN</i>                      | 1.30E-06                              | n.d.                                 |
| <i>HPK1/MAP4K1</i>              | n.d.                                  | 3.62E-09                             |
| <i>IRAK1</i>                    | 3.39E-06                              | 4.02E-08                             |
| <i>IRAK4</i>                    | n.d.                                  | 5.32E-06                             |
| <i>JNK2</i>                     | n.d.                                  | 2.99E-06                             |
| <i>LCK</i>                      | 4.50E-08                              | n.d.                                 |
| <i>LIMK1</i>                    | 3.22E-08                              | n.d.                                 |
| <i>LIMK2</i>                    | 3.59E-09                              | n.d.                                 |
| <i>LYN</i>                      | 8.57E-08                              | n.d.                                 |
| <i>MEKK1</i>                    | n.d.                                  | 1.36E-06                             |
| <i>MLK3/MAP3K11</i>             | 2.48E-06                              | n.d.                                 |
| <i>NEK1</i>                     | 9.58E-07                              | n.d.                                 |
| <i>NEK11</i>                    | 2.47E-08                              | n.d.                                 |
| <i>NEK9</i>                     | 4.70E-10                              | n.d.                                 |
| <i>p38a/MAPK14</i>              | n.d.                                  | 2.07E-08                             |
| <i>PKCnu/PRKD3</i>              | 8.40E-09                              | n.d.                                 |
| <i>PKD2/PRKD2</i>               | 1.23E-07                              | n.d.                                 |
| <i>PLK4/SAK</i>                 | 3.47E-08                              | n.d.                                 |
| <i>RAF1</i>                     | 5.12E-10                              | n.d.                                 |
| <i>RIPK2</i>                    | 4.13E-08                              |                                      |
| <i>RIPK3</i>                    | 4.08E-09                              |                                      |
| <i>SIK2</i>                     | 4.23E-08                              |                                      |
| <i>SIK3</i>                     | 1.38E-07                              |                                      |
| <i>TAOK3/JIK</i>                |                                       | 9.10E-06                             |
| <i>TNK1</i>                     | 3.78E-08                              |                                      |
| <i>ULK1</i>                     | 2.40E-07                              |                                      |
| <i>ZAK/MLTK</i>                 | 1.22E-08                              | < 1.00E-9                            |
