# Supplementary material
Source: PubMed Central journal article supplement (PMC6542668)
Supplement: EMS82808-supplement-Table_S13.pdf [file EMS82808-supplement-Table_S13.pdf]

**Table S13.**

Data collection and refinement statistics for drug-NQO2 co-crystals (molecular replacement). Data analysis and structure validation was carried out with MOLPROBITY(119) and PHENIX(120).

|                                            | <i>NQO2</i><br><i>Crenolanib</i><br>(5LBY) | <i>NQO2</i><br><i>Pacritinib</i><br>(5LBZ) | <i>NQO2</i><br><i>Volitinib</i><br>(5LBW) |
|--------------------------------------------|--------------------------------------------|--------------------------------------------|-------------------------------------------|
| <b>Data collection</b>                     |                                            |                                            |                                           |
| <i>Space group</i>                         | P212121                                    | P212121                                    | P212121                                   |
| <i>Cell dimensions</i>                     |                                            |                                            |                                           |
| <i>a, b, c (Å)</i>                         | 61.6, 79.4, 106.6                          | 61.4, 79.2, 106.2                          | 57.4, 81.4, 106.4                         |
| <i>α, β, γ (°)</i>                         | 90, 90, 90                                 | 90, 90, 90                                 | 90, 90, 90                                |
| <i>Resolution (Å)</i>                      | 44.3 - 1.4<br>(1.45 - 1.4)a                | 48.6 - 1.4<br>(1.45 - 1.4)a                | 44.5 - 1.9<br>(1.97-1.9)a                 |
| <i>R<sub>merge</sub></i>                   | 0.039 (0.276)a                             | 0.045 (0.329)a                             | 0.110 (0.976)a                            |
| <i>I/s(I)</i>                              | 22.6 (5.1)a                                | 21.1 (5.3)a                                | 7.5 (1.3)a                                |
| <i>CC1/2</i>                               | 0.999 (0.95)a                              | 0.999 (0.93)a                              | 0.996 (0.56)a                             |
| <i>Completeness (%)</i>                    | 0.93 (0.90)a                               | 0.95 (0.91)a                               | 0.90 (0.93)a                              |
| <i>Redundancy</i>                          | 4.6 (64.4)a                                | 4.5 (4.4)a                                 | 4.7 (4.0)a                                |
| <b>Refinement</b>                          |                                            |                                            |                                           |
| <i>Resolution (Å)</i>                      | 44.3 - 1.4                                 | 48.6 - 1.4                                 | 44.5 - 1.90                               |
| <i>No. reflections</i>                     | 96,392                                     | 97,697                                     | 36,195                                    |
| <i>R<sub>work</sub> / R<sub>free</sub></i> | 0.124 / 0.142                              | 0.126 / 0.145                              | 0.238/ 0.247                              |
| <i>No. atoms</i>                           |                                            |                                            |                                           |
| <i>Protein</i>                             | 3711                                       | 3697                                       | 3643                                      |
| <i>Ligands</i>                             | 174                                        | 198                                        | 160                                       |
| <i>Water</i>                               | 436                                        | 428                                        | 39                                        |
| <i>B factors</i>                           |                                            |                                            |                                           |
| <i>Protein</i>                             | 14.6                                       | 13.1                                       | 42.1                                      |
| <i>Ligands</i>                             | 12.1                                       | 14.6                                       | 46.6                                      |
| <i>Water</i>                               | 26.9                                       | 25.1                                       | 37.7                                      |
| <i>R.m.s. deviations</i>                   |                                            |                                            |                                           |
| <i>Bond lengths (Å)</i>                    | 0.96                                       | 0.96                                       | 0.97                                      |
| <i>Bond angles (°)</i>                     | 6.7                                        | 6.6                                        | 6.6                                       |

<sup>a</sup> Values in parentheses are for highest-resolution shell.
