# Supplementary material
Source: PubMed Central journal article supplement (PMC6542668)
Supplement: EMS82808-supplement-Table_S14.pdf [file EMS82808-supplement-Table_S14.pdf]

**Table S14.**

Data collection and refinement statistics for drug-MELK cocrystals (molecular replacement).

|                                            | <i>MELK</i><br><i>Nintedanib</i><br>(5MAF)    | <i>MELK</i><br><i>PF-3758309</i><br>(5MAG)    | <i>MELK</i><br><i>K-252a</i><br>(5M5A)        | <i>MELK</i><br><i>Defactinib</i><br>(5MAH)    | <i>MELK</i><br><i>BI-847325</i><br>(5MAI)  |
|--------------------------------------------|-----------------------------------------------|-----------------------------------------------|-----------------------------------------------|-----------------------------------------------|--------------------------------------------|
| <b>Data collection</b>                     |                                               |                                               |                                               |                                               |                                            |
| <i>Space group</i>                         | P2 <sub>1</sub> 2 <sub>1</sub> 2 <sub>1</sub> | I4 <sub>3</sub> 2                          |
| <i>Cell dimensions</i> □ □<br>a, b, c (Å)  | 59.91, 63.71,<br>91.29                        | 61.18, 62.81,<br>94.11                        | 63.28, 91.21,<br>59.65                        | 59.67, 63.70,<br>90.94                        | 169.13,<br>169.13, 169.13                  |
| $\alpha, \beta, \gamma$ (°)                | 90, 90, 90                                    | 90, 90, 90                                    | 90, 90, 90                                    | 90, 90, 90                                    | 90, 90, 90                                 |
| <i>Resolution</i> (Å)                      | 52.25 - 2.80<br>(2.95 - 2.80) <sup>a</sup>    | 94.11 - 2.35<br>(2.48 - 2.35) <sup>a</sup>    | 49.93 - 1.90<br>(2.00 - 1.90) <sup>a</sup>    | 43.55 - 2.00<br>(2.11 - 2.00) <sup>a</sup>    | 53.48 - 2.15<br>(2.27 - 2.15) <sup>a</sup> |
| <i>R<sub>merge</sub></i>                   | 0.129 (0.733) <sup>a</sup>                    | 0.131 (0.369) <sup>a</sup>                    | 0.032 (0.224) <sup>a</sup>                    | 0.068 (0.735) <sup>a</sup>                    | 0.063 (0.793) <sup>a</sup>                 |
| <i>1/σ(I)</i>                              | 10.5 (2.6) <sup>a</sup>                       | 7.7 (3.9) <sup>a</sup>                        | 21.3 (5.6) <sup>a</sup>                       | 15.4 (2.5) <sup>a</sup>                       | 18.1 (3.1) <sup>a</sup>                    |
| <i>CC<sub>1/2</sub></i>                    | 0.993 (0.774) <sup>a</sup>                    | 0.981 (0.885) <sup>a</sup>                    | 1.000 (0.974) <sup>a</sup>                    | 0.999 (0.824) <sup>a</sup>                    | 0.999 (0.798) <sup>a</sup>                 |
| <i>Completeness</i> (%)                    | 99.8 (99.8) <sup>a</sup>                      | 95.9 (99.9) <sup>a</sup>                      | 94.7 (84.2) <sup>a</sup>                      | 98.3 (98.6) <sup>a</sup>                      | 100.0 (100.0) <sup>a</sup>                 |
| <i>Redundancy</i>                          | 6.0 (6.2) <sup>a</sup>                        | 4.6 (4.8) <sup>a</sup>                        | 4.5 (4.6) <sup>a</sup>                        | 5.1 (4.9) <sup>a</sup>                        | 8.6 (8.5) <sup>a</sup>                     |
| <b>Refinement</b>                          |                                               |                                               |                                               |                                               |                                            |
| <i>Resolution</i> (Å)                      | 52.25 - 2.80                                  | 52.24 - 2.35                                  | 49.93 - 1.90                                  | 43.55 - 2.00                                  | 53.49 - 2.15                               |
| <i>No. reflections</i>                     | 8550                                          | 14303                                         | 19461                                         | 22356                                         | 21616                                      |
| <i>R<sub>work</sub> / R<sub>free</sub></i> | 0.223 / 0.257                                 | 0.194 / 0.251                                 | 0.185 / 0.214                                 | 18.3 / 23.8                                   | 19.2 / 23.7                                |
| <i>No. atoms</i>                           |                                               |                                               |                                               |                                               |                                            |
| <i>Protein</i>                             | 2578                                          | 2586                                          | 2587                                          | 2604                                          | 2563                                       |
| <i>Ligand</i>                              | 40                                            | 35                                            | 35                                            | 35                                            | 35                                         |
| <i>Water</i>                               | 34                                            | 92                                            | 109                                           | 105                                           | 69                                         |
| <i>B factors</i>                           |                                               |                                               |                                               |                                               |                                            |
| <i>Protein</i>                             | 57.01                                         | 36.42                                         | 43.85                                         | 38.46                                         | 54.60                                      |
| <i>Ligand</i>                              | 51.42                                         | 32.19                                         | 36.74                                         | 35.66                                         | 65.12                                      |
| <i>Water</i>                               | 46.57                                         | 35.72                                         | 47.23                                         | 42.52                                         | 55.01                                      |
| <i>R.m.s. deviations</i>                   |                                               |                                               |                                               |                                               |                                            |
| <i>Bond lengths</i> (Å)                    | 0.0076                                        | 0.0091                                        | 0.0116                                        | 0.0107                                        | 0.0120                                     |
| <i>Bond angles</i> (°)                     | 1.2854                                        | 1.4091                                        | 1.8555                                        | 1.4383                                        | 1.5352                                     |

<sup>a</sup> Values in parentheses are for highest-resolution shell.
