# Supplementary material
Source: PubMed Central journal article supplement (PMC6542668)
Supplement: EMS82808-supplement-Table_S15.pdf [file EMS82808-supplement-Table_S15.pdf]

**Table S15.**

Clinical pathology parameters of the human NSCLC tissue samples.

|                                  | Total | Adenocarcinoma | Squamous cell carcinoma |
|----------------------------------|-------|----------------|-------------------------|
| Number of patients [n]           | 375   | 186            | 189                     |
| <i>Gender [%]</i>                |       |                |                         |
| Female                           | 25    | 37             | 14                      |
| Male                             | 75    | 63             | 86                      |
| <i>Age [years]</i>               |       |                |                         |
| Average                          | 65    | 63             | 66                      |
| Range                            | 31-83 | 31-83          | 43-82                   |
| <i>pT category [%]</i>           |       |                |                         |
| pT1                              | 23    | 32             | 14                      |
| pT2                              | 49    | 46             | 52                      |
| pT3                              | 19    | 15             | 24                      |
| pT4                              | 8     | 7              | 10                      |
| <i>Lymph node metastasis [%]</i> |       |                |                         |
| pN0                              | 57    | 58             | 56                      |
| pN1                              | 15    | 10             | 20                      |
| pN2                              | 26    | 28             | 23                      |
| pN3                              | 1     | 2              | 1                       |
| pNX                              | 1     | 2              | 1                       |
| <i>Distant metastasis [%]</i>    |       |                |                         |
| M0                               | 97    | 95             | 99                      |
| M1                               | 3     | 5              | 1                       |
| <i>Residual tumour [%]</i>       |       |                |                         |
| R0                               | 89    | 90             | 88                      |
| R1                               | 9     | 10             | 7                       |
| R2                               | 1     | 0              | 1                       |
| RX                               | 2     | 0              | 4                       |
