# Supplementary material
Source: PubMed Central journal article supplement (PMC6542668)
Supplement: EMS82808-supplement-Table_S16.pdf [file EMS82808-supplement-Table_S16.pdf]

**Table S16.**

Panel of AML cell lines with mutation information and sensitivity data for Cabozantinib, Crenolanib, and Quizartinib measured by an MTS-assay. Number in brackets gives EC<sub>50</sub> for Cabozantinib in the respective cell line.

| <i>Cell line</i>  | <i>Described mutations</i>       | <i>FLT3 inhibitor sensitivity</i> | <i>FLT3 expression</i> |
|-------------------|----------------------------------|-----------------------------------|------------------------|
| <i>THP-1</i>      | NRAS, MLL-AF9                    | no                                | yes                    |
| <i>OCI-AML3</i>   | NPM1, DNMT3A                     | no                                | yes                    |
| <i>OCI-AML5</i>   |                                  | no                                | yes                    |
| <i>U-937</i>      |                                  | no                                | no                     |
| <i>KG-1a</i>      | OP1-FGFR1                        | no                                | no                     |
| <i>NB-4</i>       | PML-RARA                         | no                                | no                     |
| <i>HL-60</i>      | NRAS                             | no                                | no                     |
| <i>SD-1</i>       | BCR-ABL                          | no                                | no                     |
| <i>K-562</i>      | BCR-ABL                          | no                                | no                     |
| <i>MV-4-11</i>    | FLT3-ITD (homozygous), MLL-AF9   | yes (16 nM)                       | yes                    |
| <i>MOLM-13</i>    | FLT3-ITD (heterozygous), MLL-AF9 | yes (73 nM)                       | yes                    |
| <i>MONO-MAC-1</i> | FLT3 V592A, MLL-AF9              | yes (34 nM)                       | yes                    |
| <i>MONO-MAC-6</i> | FLT3 V592A, MLL-AF9              | yes (288 nM)                      | yes                    |
| <i>EOL-1</i>      | FIP1L1-PDGFRα                    | yes (1 nM)                        | yes                    |
| <i>KASUMI-1</i>   | KIT N822K, KRAS, AML-ETO         | yes (69 nM)                       | no                     |
