# Supplementary material
Source: PubMed Central journal article supplement (PMC6542668)
Supplement: EMS82808-supplement-Table_S17.pdf [file EMS82808-supplement-Table_S17.pdf]

**Table S17.**

Cell viability data (EC<sub>50</sub> in nM) for kinase inhibitors in AML cell lines and stable Ba/F3 cell lines expressing different FLT3 constructs (n.i. means no inhibition).

| <i>Cell line</i>                | <i>Cabozantinib</i> | <i>Quizartinib</i> | <i>Crenolanib</i> | <i>Golvatinib</i> |
|---------------------------------|---------------------|--------------------|-------------------|-------------------|
| <i>MOLM-13</i>                  | 18                  | 5                  | 8                 | 32                |
| <i>MV-4-11</i>                  | 8                   | 2                  | 3                 | 26                |
| <i>MONO-MAC-6</i>               | 16                  | 7                  | 19                |                   |
| <i>Kasumi-1</i>                 | 19                  | 17                 | >100              |                   |
| <i>OCI-AML3</i>                 | n.i.                | n.i.               | n.i.              | n.i.              |
| <i>HL-60</i>                    | n.i.                | n.i.               | n.i.              | n.i.              |
| <i>KG-1a</i>                    | n.i.                | n.i.               | n.i.              |                   |
| <i>THP-1</i>                    | n.i.                | n.i.               | n.i.              |                   |
| <i>FLT3-ITD E611C(28)</i>       | 18                  | 1                  | 33                |                   |
| <i>FLT3-ITD K602R(7)</i>        | 5                   | 0.3                | 9                 |                   |
| <i>FLT3-ITD 598/599(22)</i>     | 5                   | 2                  | 10                |                   |
| <i>KIT CBL Δexon8</i>           | 32                  | 14                 | >100              |                   |
| <i>FLT3-ITD E611C(28) D835Y</i> | n.i.                | n.i.               | 64                |                   |
| <i>FLT3-ITD E611C(28) N676K</i> | 22                  | 58                 | 85                |                   |
| <i>FLT3 D835Y</i>               | 57                  | 7                  | 2                 |                   |
| <i>FLT3 N676K D835Y</i>         | >100                | 66                 | 6                 |                   |

FLT3-ITD Nomenclature according to Janke *et al.*(83) and Arreba-Tutusaus *et al.*(121):

FLT3-ITD K602R(7) = FLT3-ITD (w51) = FLT3-ITD 3

FLT3-ITD E611C(28) = FLT3-ITD (Npos) = FLT3-ITD 2

FLT3-ITD 598/599(22) = FLT3-ITD (w78) = FLT3-ITD 1
